# Supplementary material
Source: PubMed Central journal article supplement (PMC9281876)
Supplement: NIHMS1817944-supplement-Supplementary_data.pdf [file NIHMS1817944-supplement-Supplementary_data.pdf]

input data can be found at [https://github.com/Greerlab/OSN\\_2021\\_paper](https://github.com/Greerlab/OSN_2021_paper) and <https://www.ncbi.nlm.nih.gov/geo/query/acc.cgi?acc=GSE169021>

```
In [ ]: library(dplyr)
library(ggpubr)
library(patchwork)
library(ggplot2)
library(rstatix)
library(car)
library(coin)
library(Seurat)
```

## Statistical analysis for figure 2c

OR = with OR. RM = without OR. SH = shuffle control

```
In [13]: OR = list.files("data/sil/OR/",pattern = "0.rds|1.rds",full.names = T)
RM = list.files("data/sil/Removed/",pattern = "0.rds|1.rds",full.names = T)
SH = list.files("data/sil/shuffle/",pattern = "0.rds|1.rds",full.names = T)

OR_v = c()
for (i in 1:length(OR)) {
  OR_v = c(OR_v, readRDS(OR[i]))
}

RM_v = c()
for (i in 1:length(RM)) {
  RM_v = c(RM_v, readRDS(RM[i]))
}

SH_v = c()
for (i in 1:length(SH)) {
  SH_v = c(SH_v, readRDS(SH[i]))
}
```

```
In [14]: df = as.data.frame(cbind("score" = c(OR_v,RM_v,SH_v), "group" = c(rep("OR", length(OR_v)), rep("RM", length(RM_v)), rep("SH", length(SH_v))))
df$score = as.numeric(df$score)
df$group = as.factor(df$group)
```

```
In [15]: options(repr.plot.width=12, repr.plot.height=4)
p1 = ggqqplot(df[df$group == "OR",]$score)
p2 = ggqqplot(df[df$group == "RM",]$score)
p3 = ggqqplot(df[df$group == "SH",]$score)
p1+p2+p3
```

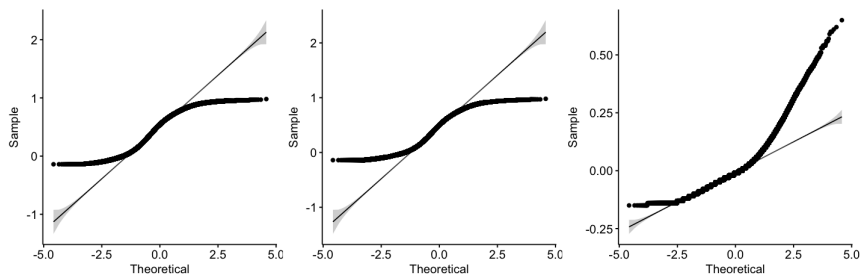

```
In [16]: shapiro.test(sample(df[df$group == "OR",]$score,5000,replace = F))
shapiro.test(sample(df[df$group == "RM",]$score,5000,replace = F))
shapiro.test(sample(df[df$group == "SH",]$score,5000,replace = F))
```

Shapiro-Wilk normality test

```
data: sample(df[df$group == "OR",]$score, 5000, replace = F)
W = 0.95023, p-value < 2.2e-16
Shapiro-Wilk normality test
```

```
data: sample(df[df$group == "RM",]$score, 5000, replace = F)
W = 0.9497, p-value < 2.2e-16
Shapiro-Wilk normality test
```

```
data: sample(df[df$group == "SH",]$score, 5000, replace = F)
W = 0.90754, p-value < 2.2e-16
```

```
In [17]: leveneTest(df$score, df$group, center = median)
```

```

A anova: 2 x 3
  Df  F value Pr(>F)
  <int> <dbl> <dbl>
group  2 157747.1    0
640596    NA    NA
```

In [18]:

```
pairwise_wilcox_test(df, score ~group, p.adjust.method = "BH", exact = T, detailed = T)
```

A rstatix\_test: 3 x 14

|   | estimate   | .y.   | group1 | group2 | n1     | n2     | statistic   | p         | conf.low   | conf.high  | method   | alternative | p.adj     | p.adj.signif |
|---|------------|-------|--------|--------|--------|--------|-------------|-----------|------------|------------|----------|-------------|-----------|--------------|
|   | <dbl>      | <chr> | <chr>  | <chr>  | <int>  | <int>  | <dbl>       | <dbl>     | <dbl>      | <dbl>      | <chr>    | <chr>       | <dbl>     | <chr>        |
| 1 | 0.03001788 | score | OR     | RM     | 213533 | 213533 | 24182179840 | 1.04e-258 | 0.02995157 | 0.03004161 | Wilcoxon | two.sided   | 1.04e-258 | ****         |
| 2 | 0.53002728 | score | OR     | SH     | 213533 | 213533 | 42723287816 | 0.00e+00  | 0.53004851 | 0.53998912 | Wilcoxon | two.sided   | 0.00e+00  | ****         |
| 3 | 0.49004557 | score | RM     | SH     | 213533 | 213533 | 42121445242 | 0.00e+00  | 0.49000045 | 0.49000738 | Wilcoxon | two.sided   | 0.00e+00  | ****         |

```
In [21]: rstatix::wilcox_effsize(df, score ~ group, ci = T)
```

A rstatix\_test: 3 x 9

|   | .y.   | group1 | group2 | effsize    | n1     | n2     | conf.low | conf.high | magnitude |
|---|-------|--------|--------|------------|--------|--------|----------|-----------|-----------|
|   | <chr> | <chr>  | <chr>  | <dbl>      | <int>  | <int>  | <dbl>    | <dbl>     | <ord>     |
| 1 | score | OR     | RM     | 0.05257655 | 213533 | 213533 | 0.05     | 0.06      | small     |
| 2 | score | OR     | SH     | 0.75707693 | 213533 | 213533 | 0.76     | 0.76      | large     |
| 3 | score | RM     | SH     | 0.73422134 | 213533 | 213533 | 0.73     | 0.74      | large     |

## Statistical analysis for figure 2d right

```
In [22]: df = read.table("data/F2d_654_result.txt")
```

```
In [23]: options(repr.plot.width=16, repr.plot.height=8)
plots = list()
r = 1
for (i in 1:length(unique(df$Threshold))) {
  inputs = unique(df$Threshold)[i]
  tmp = df[df$Threshold==inputs,]
  a = tmp[tmp$Group=="OR", "Balanced_accuracy"]
  b = tmp[tmp$Group=="Shuffle", "Balanced_accuracy"]
  plots[[r]] = ggplot(a)+ggtitle(paste(inputs, "OR", "Balanced_accuracy"))
  r = r+1
  plots[[r]] = ggplot(b)+ggtitle(paste(inputs, "Shuffle", "Balanced_accuracy"))
  r = r+1
}
wrap_plots(plots, nrow = 2, byrow = T)
```

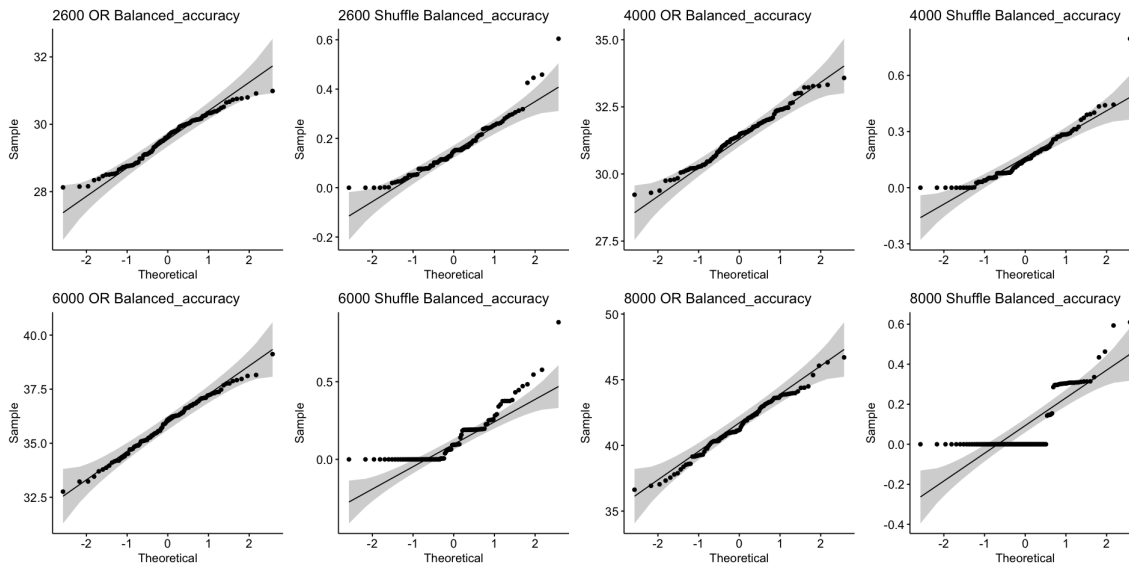

```
In [24]: for (i in 1:length(unique(df$Threshold))) {
  inputs = unique(df$Threshold)[i]
  tmp = df[df$Threshold==inputs,]
  a = tmp[tmp$Group=="OR", "Balanced_accuracy"]
  b = tmp[tmp$Group=="Shuffle", "Balanced_accuracy"]
  print(paste(inputs, "OR", "Balanced_accuracy"))
  print(shapiro.test(a))
  print(paste(inputs, "Shuffle", "Balanced_accuracy"))
  print(shapiro.test(b))
  print(levTest(tmp$Balanced_accuracy, tmp$Group, center = median))
}
```

```
[1] "2600 OR Balanced_accuracy"
```

```
Shapiro-Wilk normality test
```

```
data: a
```

```
W = 0.97404, p-value = 0.04543
```

```
[1] "2600 Shuffle Balanced_accuracy"
```

```

Shapiro-Wilk normality test

data: b
W = 0.92439, p-value = 2.426e-05

Warning message in leveneTest.default(tmp$Balanced_accuracy, tmp$Group, center = median):
"tmp$Group coerced to factor."
Levene's Test for Homogeneity of Variance (center = median)
  Df F value    Pr(>F)
group 1 180.07 < 2.2e-16 ***
198
---
Signif. codes:  0 '***' 0.001 '**' 0.01 '*' 0.05 '.' 0.1 ' ' 1
[1] "4000 OR Balanced_accuracy"

Shapiro-Wilk normality test

data: a
W = 0.98562, p-value = 0.3515

[1] "4000 Shuffle Balanced_accuracy"

Shapiro-Wilk normality test

data: b
W = 0.90243, p-value = 1.842e-06

Warning message in leveneTest.default(tmp$Balanced_accuracy, tmp$Group, center = median):
"tmp$Group coerced to factor."
Levene's Test for Homogeneity of Variance (center = median)
  Df F value    Pr(>F)
group 1 133.77 < 2.2e-16 ***
198
---
Signif. codes:  0 '***' 0.001 '**' 0.01 '*' 0.05 '.' 0.1 ' ' 1
[1] "6000 OR Balanced_accuracy"

Shapiro-Wilk normality test

data: a
W = 0.99073, p-value = 0.7238

[1] "6000 Shuffle Balanced_accuracy"

Shapiro-Wilk normality test

data: b
W = 0.80498, p-value = 3.531e-10

Warning message in leveneTest.default(tmp$Balanced_accuracy, tmp$Group, center = median):
"tmp$Group coerced to factor."
Levene's Test for Homogeneity of Variance (center = median)
  Df F value    Pr(>F)
group 1 150.74 < 2.2e-16 ***
198
---
Signif. codes:  0 '***' 0.001 '**' 0.01 '*' 0.05 '.' 0.1 ' ' 1
[1] "8000 OR Balanced_accuracy"

Shapiro-Wilk normality test

data: a
W = 0.98837, p-value = 0.536

[1] "8000 Shuffle Balanced_accuracy"

Shapiro-Wilk normality test

data: b
W = 0.63528, p-value = 2.119e-14

Warning message in leveneTest.default(tmp$Balanced_accuracy, tmp$Group, center = median):
"tmp$Group coerced to factor."
Levene's Test for Homogeneity of Variance (center = median)
  Df F value    Pr(>F)
group 1 162.42 < 2.2e-16 ***
198
---
Signif. codes:  0 '***' 0.001 '**' 0.01 '*' 0.05 '.' 0.1 ' ' 1

```

In [25]:

```

for (i in 1:length(unique(df$Threshold))) {
  inputs = unique(df$Threshold)[i]
  tmp = df[df$Threshold==inputs,]
  x = rstatix::wilcox_test( tmp, Balanced_accuracy ~Group, exact =T, detailed = T)
  print( x)
}

# A tibble: 1 × 12
  estimate .y. group1 group2 n1 n2 statistic p conf.low conf.high
* <dbl> <chr> <chr> <chr> <int> <int> <dbl> <dbl> <dbl> <dbl>
1 29.5 Bala... OR Shuff... 100 100 10000 2.54e-34 29.3 29.7
# ... with 2 more variables: method <chr>, alternative <chr>

# A tibble: 1 × 12
  estimate .y. group1 group2 n1 n2 statistic p conf.low conf.high
* <dbl> <chr> <chr> <chr> <int> <int> <dbl> <dbl> <dbl> <dbl>
1 31.3 Bala... OR Shuff... 100 100 10000 2.54e-34 31.1 31.4
# ... with 2 more variables: method <chr>, alternative <chr>

```

```
# A tibble: 1 × 12
  estimate.y. group1 group2 n1 n2 statistic p conf.low conf.high
* <dbl> <chr> <chr> <chr> <int> <int> <dbl> <dbl> <dbl> <dbl>
1 35.9 Bala... OR Shuff... 100 100 10000 1.59e-34 35.5 36.2
# ... with 2 more variables: method <chr>, alternative <chr>
# A tibble: 1 × 12
  estimate.y. group1 group2 n1 n2 statistic p conf.low conf.high
* <dbl> <chr> <chr> <chr> <int> <int> <dbl> <dbl> <dbl> <dbl>
1 41.2 Bala... OR Shuff... 100 100 10000 8.87e-36 40.9 41.9
# ... with 2 more variables: method <chr>, alternative <chr>
```

```
In [26]: df %>% group_by(Threshold) %>% wilcox_effsize(Balanced_accuracy ~Group, ci = T)
```

A rstatix\_test: 4 × 10

|   | .y.               | group1 | group2  | effsize   | Threshold | n1    | n2    | conf.low | conf.high | magnitude |
|---|-------------------|--------|---------|-----------|-----------|-------|-------|----------|-----------|-----------|
|   | <chr>             | <chr>  | <chr>   | <dbl>     | <int>     | <int> | <int> | <dbl>    | <dbl>     | <ord>     |
| 1 | Balanced_accuracy | OR     | Shuffle | 0.8639180 | 2600      | 100   | 100   | 0.85     | 0.86      | large     |
| 2 | Balanced_accuracy | OR     | Shuffle | 0.8639248 | 4000      | 100   | 100   | 0.85     | 0.86      | large     |
| 3 | Balanced_accuracy | OR     | Shuffle | 0.8666190 | 6000      | 100   | 100   | 0.86     | 0.87      | large     |
| 4 | Balanced_accuracy | OR     | Shuffle | 0.8830041 | 8000      | 100   | 100   | 0.87     | 0.89      | large     |

## Statistical analysis for figure 2d left

```
In [27]: df = read.table("data/F2d_10_result.txt")
```

```
In [28]: for (i in 1:length(unique(df$Threshold))) {
  inputs = unique(df$Threshold)[i]
  tmp = df[df$Threshold==inputs,]
  x = rstatix::wilcox_test(tmp, Balanced_accuracy ~Group, exact = T, detailed = T)
  print(x)
}
```

```
# A tibble: 1 × 12
  estimate.y. group1 group2 n1 n2 statistic p conf.low conf.high
* <dbl> <chr> <chr> <chr> <int> <int> <dbl> <dbl> <dbl> <dbl>
1 84.2 Bala... OR Shuff... 100 100 10000 2.21e-59 83.9 84.6
# ... with 2 more variables: method <chr>, alternative <chr>
# A tibble: 1 × 12
  estimate.y. group1 group2 n1 n2 statistic p conf.low conf.high
* <dbl> <chr> <chr> <chr> <int> <int> <dbl> <dbl> <dbl> <dbl>
1 84.6 Bala... OR Shuff... 100 100 10000 2.21e-59 84.3 84.9
# ... with 2 more variables: method <chr>, alternative <chr>
# A tibble: 1 × 12
  estimate.y. group1 group2 n1 n2 statistic p conf.low conf.high
* <dbl> <chr> <chr> <chr> <int> <int> <dbl> <dbl> <dbl> <dbl>
1 86.1 Bala... OR Shuff... 100 100 10000 2.21e-59 85.7 86.6
# ... with 2 more variables: method <chr>, alternative <chr>
# A tibble: 1 × 12
  estimate.y. group1 group2 n1 n2 statistic p conf.low conf.high
* <dbl> <chr> <chr> <chr> <int> <int> <dbl> <dbl> <dbl> <dbl>
1 87.0 Bala... OR Shuff... 100 100 10000 2.56e-34 86.4 87.7
# ... with 2 more variables: method <chr>, alternative <chr>
```

```
In [29]: df %>% group_by(Threshold) %>% wilcox_effsize(Balanced_accuracy ~Group, ci = T)
```

A rstatix\_test: 4 × 10

|   | .y.               | group1 | group2  | effsize   | Threshold | n1    | n2    | conf.low | conf.high | magnitude |
|---|-------------------|--------|---------|-----------|-----------|-------|-------|----------|-----------|-----------|
|   | <chr>             | <chr>  | <chr>   | <dbl>     | <int>     | <int> | <int> | <dbl>    | <dbl>     | <ord>     |
| 1 | Balanced_accuracy | OR     | Shuffle | 0.8638684 | 2600      | 100   | 100   | 0.85     | 0.86      | large     |
| 2 | Balanced_accuracy | OR     | Shuffle | 0.8638684 | 4000      | 100   | 100   | 0.85     | 0.86      | large     |
| 3 | Balanced_accuracy | OR     | Shuffle | 0.8638684 | 6000      | 100   | 100   | 0.85     | 0.86      | large     |
| 4 | Balanced_accuracy | OR     | Shuffle | 0.8638778 | 8000      | 100   | 100   | 0.85     | 0.86      | large     |

## Statistical analysis for figure 2e

simi = protein sequence similarity, chr = chromosome, cls = genome cluster

```
In [30]: df = read.table("data/prediction_error_info_fold_change.txt", header = T)
```

```
In [31]: options(repr.plot.width=12, repr.plot.height=4)
p1 = ggqqplot(df[df$group == "simi",]$value)
p2 = ggqqplot(df[df$group == "chr",]$value)
p3 = ggqqplot(df[df$group == "cls",]$value)
p1+p2+p3
```

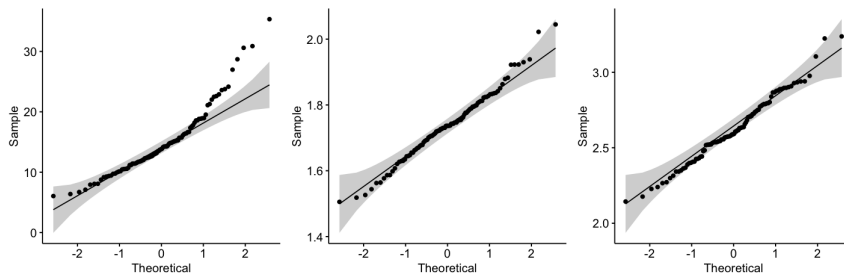

```
In [33]: for (i in 1:length(unique(df$group))) {
  inputs = unique(df$group)[i]
  tmp = df[df$group==inputs,]
  print(inputs)
  print(shapiro.test(tmp$value))
}
leveneTest(df$value, df$group, center = median)
```

```
[1] "simi"

      Shapiro-Wilk normality test

data:  tmp$value
W = 0.91233, p-value = 5.642e-06
```

```
[1] "chr"

      Shapiro-Wilk normality test

data:  tmp$value
W = 0.98664, p-value = 0.4138
```

```
[1] "cls"

      Shapiro-Wilk normality test

data:  tmp$value
W = 0.98558, p-value = 0.3492
```

Warning message in leveneTest.default(df\$value, df\$group, center = median):  
"df\$group coerced to factor."

|       | Df    | F value  | Pr(>F)       |
|-------|-------|----------|--------------|
|       | <int> | <dbl>    | <dbl>        |
| group | 2     | 96.17285 | 6.257345e-33 |
|       | 297   | NA       | NA           |

```
In [34]: pairwise_wilcox_test(df, value ~group, p.adjust.method = "BH", exact =T, detailed = T)
```

A rstatix\_test: 3 x 14

|   | estimate  | .y.   | group1 | group2 | n1    | n2    | statistic | p        | conf.low    | conf.high   | method   | alternative | p.adj    | p.adj.signif |
|---|-----------|-------|--------|--------|-------|-------|-----------|----------|-------------|-------------|----------|-------------|----------|--------------|
|   | <dbl>     | <chr> | <chr>  | <chr>  | <int> | <int> | <dbl>     | <dbl>    | <dbl>       | <dbl>       | <chr>    | <chr>       | <dbl>    | <chr>        |
| 1 | -0.87466  | value | chr    | cls    | 100   | 100   | 0         | 2.21e-59 | -0.9243767  | -0.8296805  | Wilcoxon | two.sided   | 2.21e-59 | ****         |
| 2 | -12.10671 | value | chr    | simi   | 100   | 100   | 0         | 2.21e-59 | -13.0413655 | -11.0854622 | Wilcoxon | two.sided   | 2.21e-59 | ****         |
| 3 | -11.24368 | value | cls    | simi   | 100   | 100   | 0         | 2.21e-59 | -12.1100326 | -10.2104330 | Wilcoxon | two.sided   | 2.21e-59 | ****         |

```
In [35]: wilcox_effsize(df, value ~group, ci = T)
```

A rstatix\_test: 3 x 9

|   | .y.   | group1 | group2 | effsize   | n1    | n2    | conf.low | conf.high | magnitude |
|---|-------|--------|--------|-----------|-------|-------|----------|-----------|-----------|
|   | <chr> | <chr>  | <chr>  | <dbl>     | <int> | <int> | <dbl>    | <dbl>     | <ord>     |
| 1 | value | chr    | cls    | 0.8638684 | 100   | 100   | 0.85     | 0.86      | large     |
| 2 | value | chr    | simi   | 0.8638684 | 100   | 100   | 0.85     | 0.86      | large     |
| 3 | value | cls    | simi   | 0.8638684 | 100   | 100   | 0.85     | 0.86      | large     |

## Statistical analysis for figure 2f

distance = TSS distance, similarity = protein sequence similarity, correlation = transcriptome correlation

```
In [36]: df = read.table("data/TSS_results.txt", header = T)
```

```
In [37]: summary(lm(similarity~distance, df))
summary(lm(correlation~distance, df))

Call:
lm(formula = similarity ~ distance, data = df)
```

```

Residuals:
  Min       1Q   Median       3Q      Max
-0.43467 -0.07798 -0.00726  0.06603  0.45741

Coefficients:
            Estimate Std. Error t value Pr(>|t|)
(Intercept)  5.447e-01  6.793e-04  801.8  <2e-16 ***
distance    -5.695e-08  4.163e-10  -136.8  <2e-16 ***
---
Signif. codes:  0 '***' 0.001 '**' 0.01 '*' 0.05 '.' 0.1 ' ' 1

Residual standard error: 0.1152 on 66564 degrees of freedom
Multiple R-squared:  0.2194,    Adjusted R-squared:  0.2194
F-statistic: 1.871e+04 on 1 and 66564 DF,  p-value: < 2.2e-16
Call:
lm(formula = correlation ~ distance, data = df)

Residuals:
  Min       1Q   Median       3Q      Max
-1.04377 -0.28735  0.01896  0.29509  0.96322

Coefficients:
            Estimate Std. Error t value Pr(>|t|)
(Intercept)  2.738e-01  2.188e-03  125.15  <2e-16 ***
distance    -8.338e-08  1.341e-09  -62.18  <2e-16 ***
---
Signif. codes:  0 '***' 0.001 '**' 0.01 '*' 0.05 '.' 0.1 ' ' 1

Residual standard error: 0.3711 on 66564 degrees of freedom
Multiple R-squared:  0.0549,    Adjusted R-squared:  0.05488
F-statistic: 3866 on 1 and 66564 DF,  p-value: < 2.2e-16

```

In [38]:

```

cor.test(df$distance, df$similarity)
cor.test(df$distance, df$correlation)

```

Pearson's product-moment correlation

```

data: df$distance and df$similarity
t = -136.78, df = 66564, p-value < 2.2e-16
alternative hypothesis: true correlation is not equal to 0
95 percent confidence interval:
 -0.4743225 -0.4624626
sample estimates:
 cor
-0.4684136
Pearson's product-moment correlation

```

```

data: df$distance and df$correlation
t = -62.181, df = 66564, p-value < 2.2e-16
alternative hypothesis: true correlation is not equal to 0
95 percent confidence interval:
 -0.2414703 -0.2271110
sample estimates:
 cor
-0.2343034

```

## Statistical analysis for extended figure 6a

In [41]:

```

Sets = c()
Reps = c()
RNA_count = c()
Gene_count = c()
for (x in 1:2) {
  for (i in 1:20) {
    slide = readRDS(paste0("data/OB",x,"_slideseq/Slide",i,".rds"))
    RNA_count = c(RNA_count,slide$nCount_RNA)
    Gene_count = c(Gene_count,slide$nFeature_RNA)
    Sets = c(Sets,rep(x,ncol(slide)))
    Reps = c(Reps,rep(i,ncol(slide)))
  }
}
df = cbind.data.frame(Sets,Reps,RNA_count,Gene_count)
df$Sets = factor(df$Sets)
df$Reps = factor(df$Reps)

```

In [42]:

```

print("Row: slides , Column: OB reps")
table(df$Reps, df$Sets)

```

[1] "Row: slides , Column: OB reps"

|    | 1     | 2     |
|----|-------|-------|
| 1  | 30827 | 30041 |
| 2  | 35355 | 34997 |
| 3  | 40365 | 41337 |
| 4  | 43840 | 46648 |
| 5  | 55086 | 42455 |
| 6  | 52364 | 50483 |
| 7  | 49682 | 49562 |
| 8  | 47024 | 45535 |
| 9  | 56016 | 39903 |
| 10 | 47249 | 37956 |
| 11 | 53359 | 41202 |
| 12 | 49049 | 44306 |
| 13 | 47076 | 38022 |
| 14 | 45479 | 49988 |
| 15 | 46893 | 49694 |

16 49717 51734  
17 43088 50418  
18 50225 49625  
19 52795 52260  
20 51450 35047
